# Supplementary material for: Effect of TiO2 on Ru/ZrO2 catalysts in the catalytic wet air oxidation of isothiazolone
Source: Royal Society of Chemistry journal article supplement (doi:10.1039/c4cy01455c), 2014-12-08
Supplement: c4cy01455c1.pdf [file c4cy01455c1.pdf]

*Supplementary Material for*

**Effect of TiO<sub>2</sub> on Ru/ZrO<sub>2</sub> Catalysts in the Catalytic Wet  
Air Oxidation of Isothiazolone**

Huangzhao Wei<sup>a†</sup>, Yamin Wang<sup>a†</sup>, Yang Yu<sup>a</sup>, Bin Gu<sup>a</sup>, Ying Zhao<sup>a</sup>, Xu Yang<sup>a</sup>,

Chenglin Sun<sup>a\*</sup>

<sup>a</sup> *Dalian National Laboratory for Clean Energy, Dalian Institute of Chemical Physics, Chinese*

*Academy of Sciences, Dalian 116023, P. R. China*

<sup>†</sup> *These authors contributed equally to this work and should be considered co-first authors.*

*\*Corresponding author phone: +86 411 84379326, Fax: +86 411 84699965, and Email:*

[clsun@dicp.ac.cn](mailto:clsun@dicp.ac.cn)

**Summary:** This file contains 4 pages, including 3 figures.

---

\* Corresponding author at: Dalian Institute of Chemical Physics,  
Chinese Academy of Sciences, No. 457 Zhongshan Road, Dalian 116023, P.R. China.  
Tel.: +86 411 84379326; fax: +86 411 84699965.  
E-mail address: [clsun@dicp.ac.cn](mailto:clsun@dicp.ac.cn).

## S1. Characteristics of the reactor

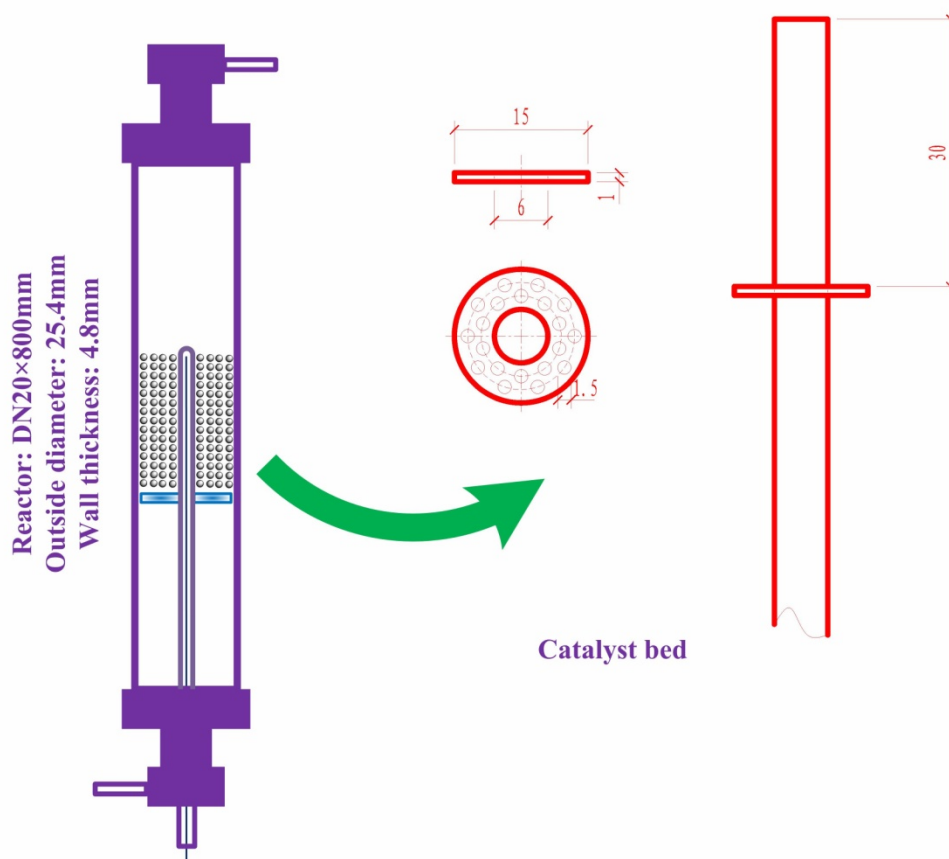

S-Fig. 1. The exact characteristics of the reactor and the catalyst bed.

## S2. In-situ XRD of the $0.5\text{TiZrO}_4$ support

The in-situ X-ray diffraction (XRD) spectra of the  $0.5\text{TiZrO}_4$  support were obtained using an X'Pert PRO instrument produced by PANalytical, which were collected under the ambient air conditions and a heating rate of  $10\text{ }^\circ\text{C}\cdot\text{min}^{-1}$ .

The phase changes of freshly precipitated hydrous  $0.5\text{TiZrO}_4$  were monitored using in-situ X-ray diffractometry; the results are presented in S-Fig. 2. As shown in S-Fig. 2, the amorphous hydrous  $0.5\text{TiZrO}_4$  transformed to the tetragonal phase and the Srilankite phase (S) at  $650^\circ\text{C}$  and  $700^\circ\text{C}$  in air, respectively. The peak at

$2\theta=30.5^\circ$  corresponds to the (111) reflection of the Srilankite phase. Note that the Srilankite phase is difficult to distinguish from tetragonal  $ZrO_2$ . However, the peak intensity of the Srilankite phase (5398 a.u.) is larger than that of the tetragonal phase (4049 a.u.).

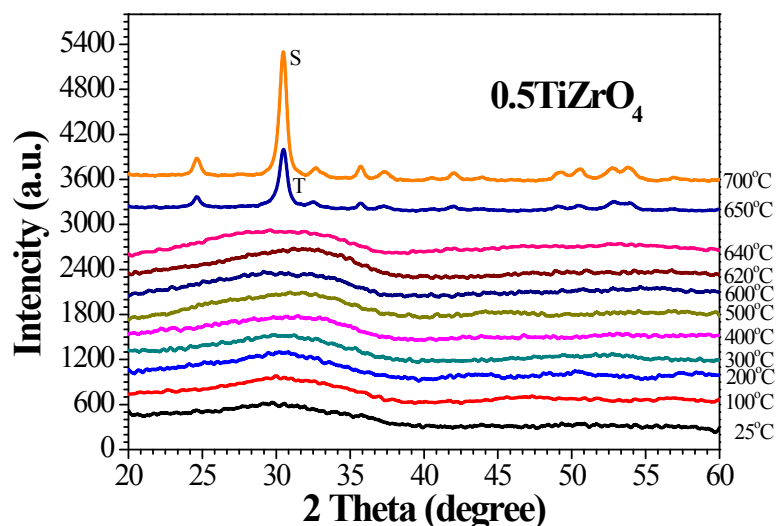

S-Fig. 2. In-situ XRD pattern of the  $0.5TiZrO_4$  support.

### S3. Intermediate products analyses

For the  $Ru/0.2TiZrO_4$  catalyst, the difference between isothiazolone conversion and TOC removal is 17.4%, which indicates that some intermediates are produced during the CWAO treatment process for isothiazolone. The treated effluent was analyzed by GC-MS, GC, IC and NMR, and the results are presented in S-Fig. 3. As shown in S-Fig. 3, there were ten types of intermediates.

As shown in S-Fig. 3 (D),  $^1H$  NMR ( $CDCl_3$ , 400 MHz)  $\delta$  6.22 (d,  $J=13.5$  Hz, 1H) and 7.4 (d,  $J=13.5$  Hz, 1H) were attributed to an ethylenic bond H, and  $\delta$  2.07 was a methyl H connected to N.  $^{13}C$  NMR ( $CDCl_3$ , 400 MHz)  $\delta$  167.48 was a carbonyl C,
